# Supplementary material for: Natural killer cells act as an extrinsic barrier for in vivo reprogramming
Source: PubMed Central journal article supplement (PMC9124575; doi:10.1242/dev.200361), 2022-04-22
Supplement: develop-149-200361-s1.pdf [file develop-149-200361-s1.pdf]

## Figure S1

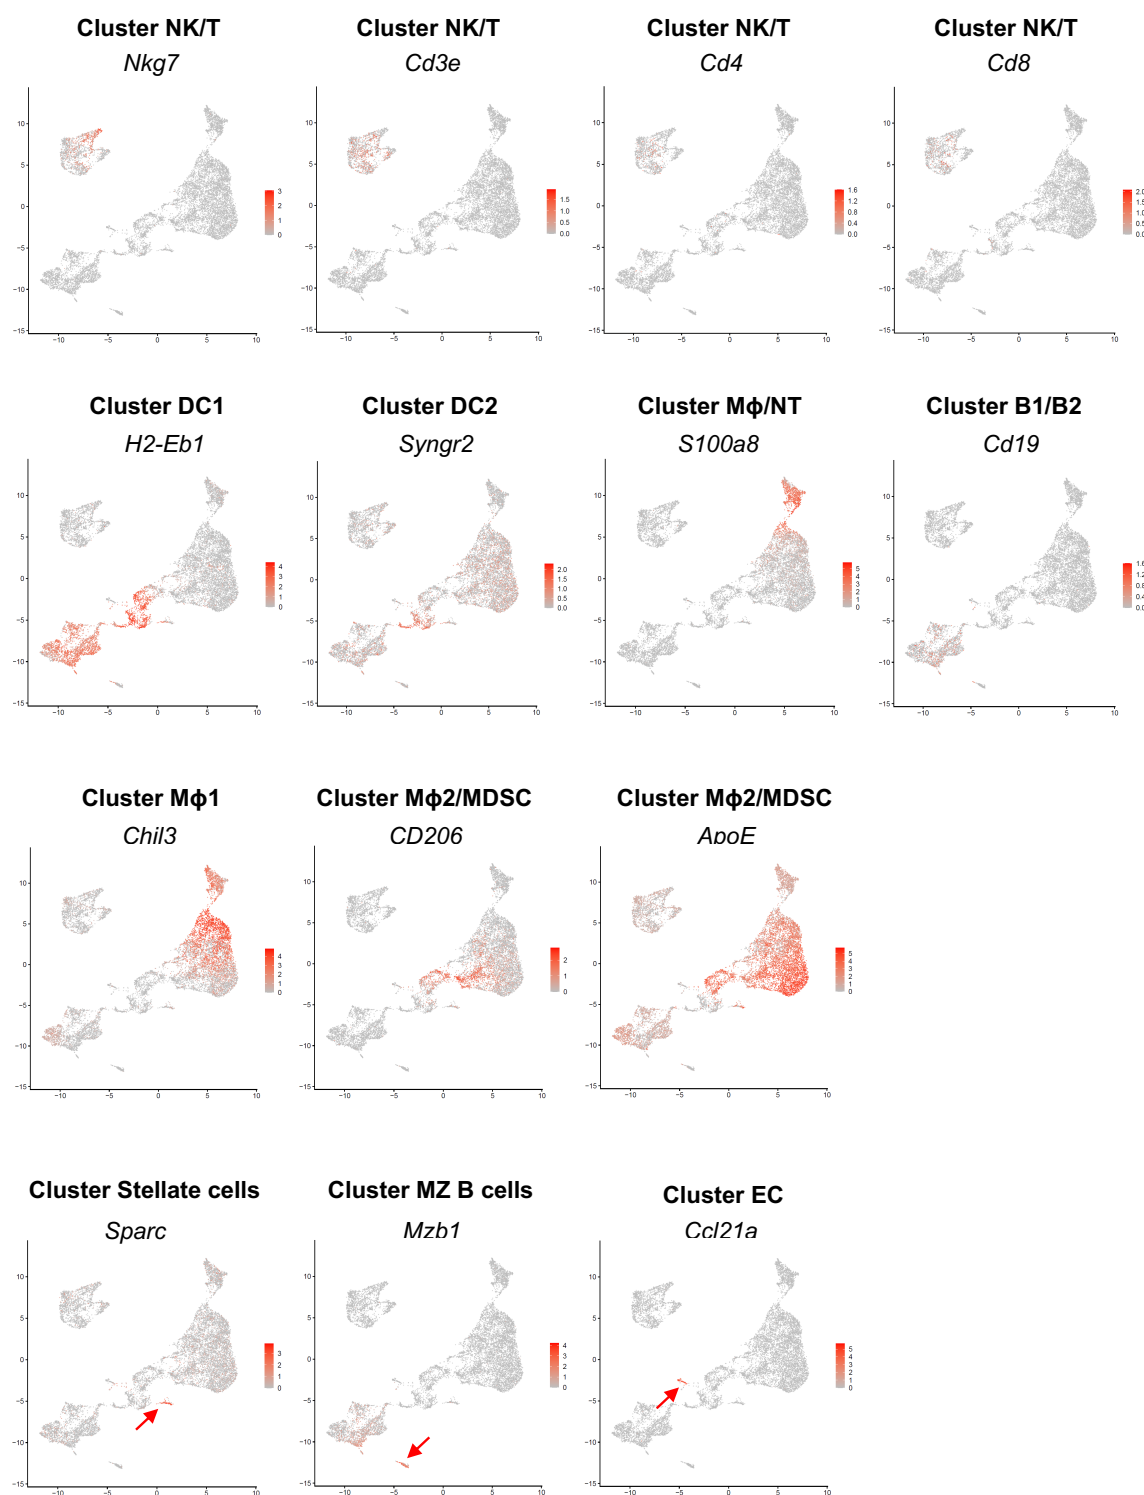

**Fig. S1. UMAP showing the expression level of representative markers for each cell type. A.** Top markers of each cluster are represented in UMAPs plots. Mφ = macrophages, NT = neutrophils, DC = dendritic cells, NK = natural killer cells, T = T cells, B = B cells, EC = endothelial cells and MZ = marginal zone.

## Figure S2

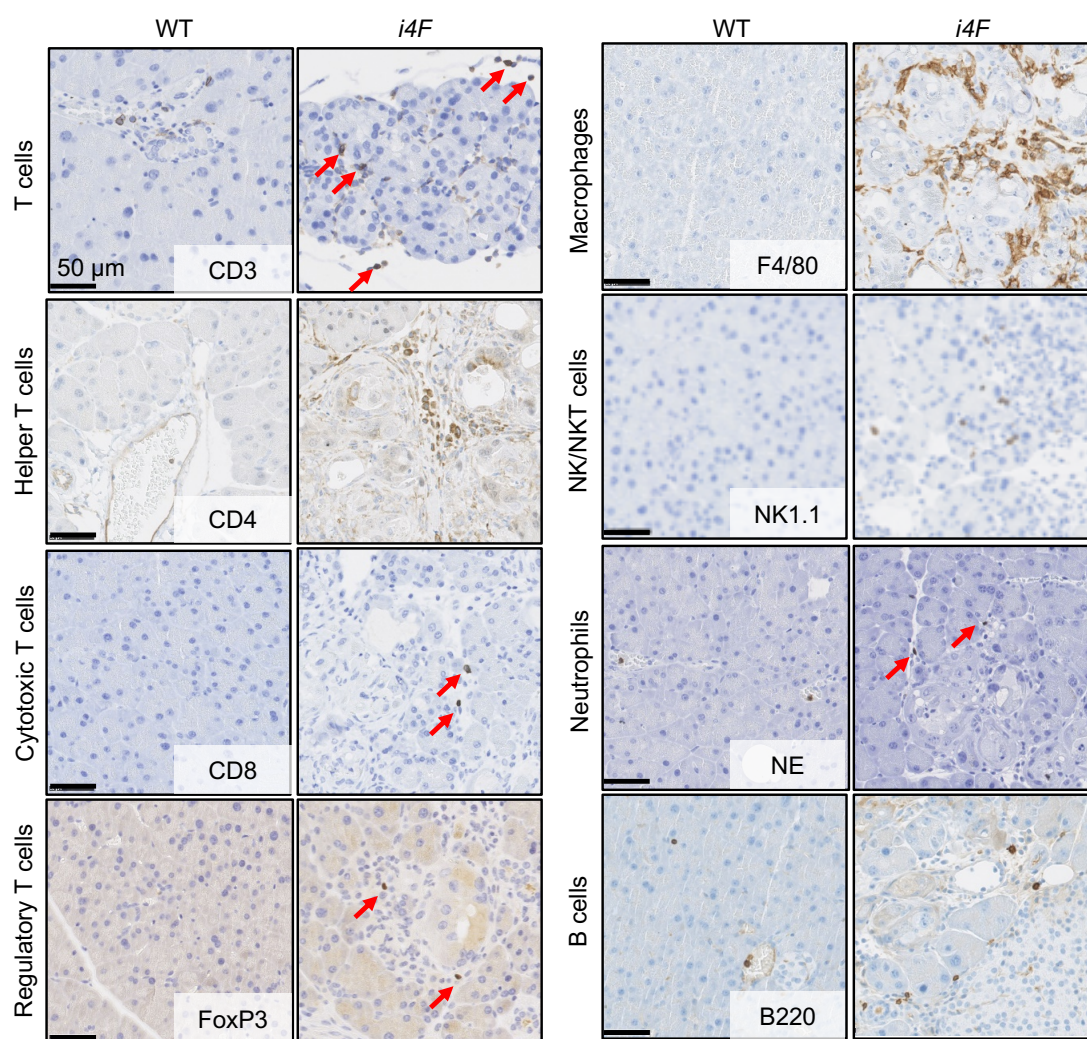

**Fig. S2. Immune cells infiltrate partially reprogrammed pancreas.** Representative images of partially reprogrammed pancreas at day 7 stained for the indicated immune cell markers ( $n=4$ ): CD3 (T cells), CD4 (helper T cells), CD8 (cytotoxic T cells), FoxP3 (regulatory T cells), F4/80 (macrophages), NK1.1 (NK/NKT cells), NE (neutrophil elastase, neutrophils) and B220 (B cells).

## Figure S3

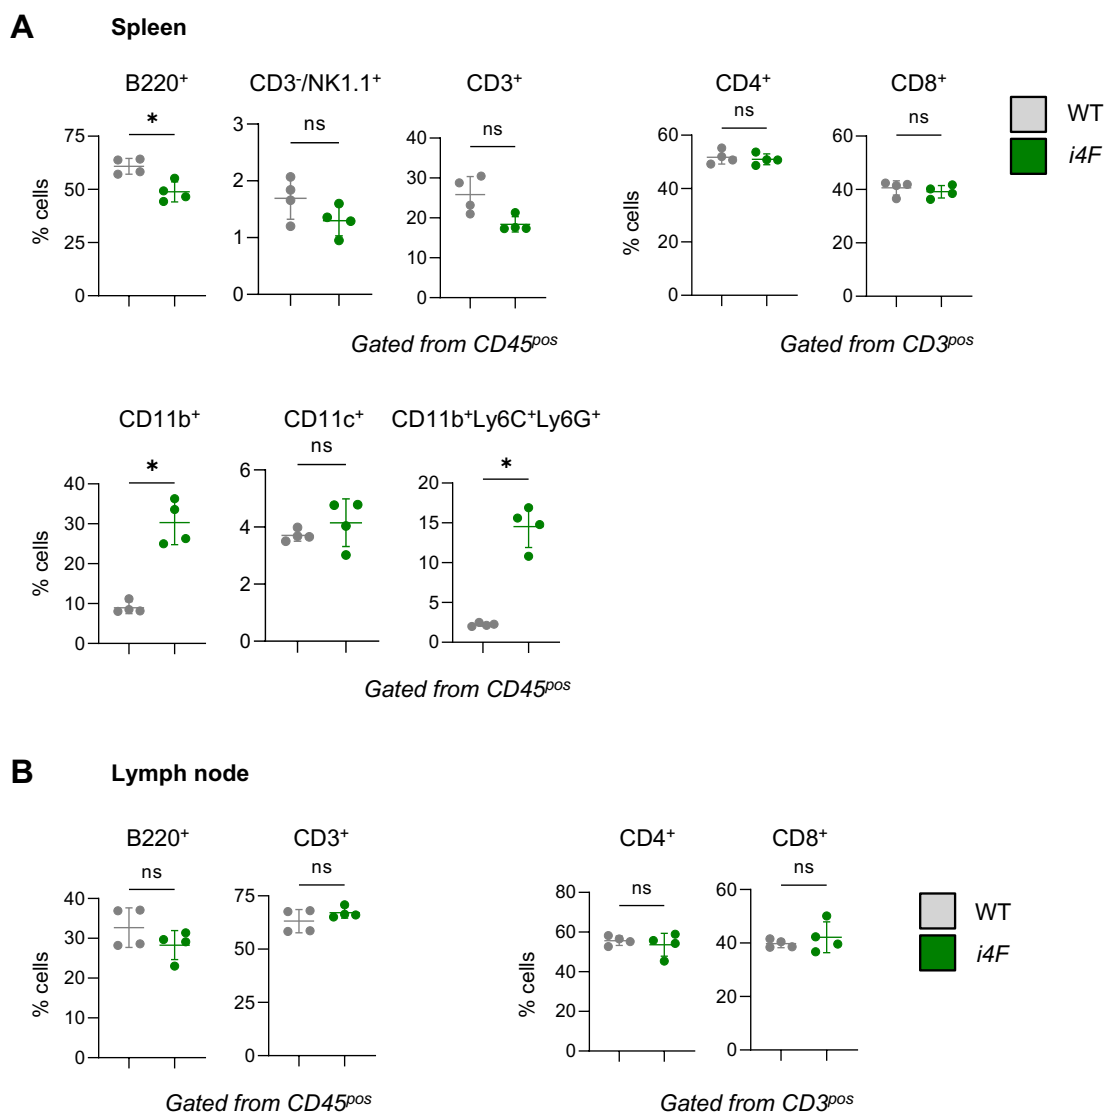

**Fig. S3. Gr1<sup>+</sup> cells and CD11b<sup>+</sup> cells are upregulated in the spleen of *i4F* mice.** Spleen and lymph nodes of *i4F* mice treated with doxycycline for 7 days (1 mg/ml) were harvested and most abundant immune populations were analysed by flow cytometry ( $n=4$ ).

## Figure S4

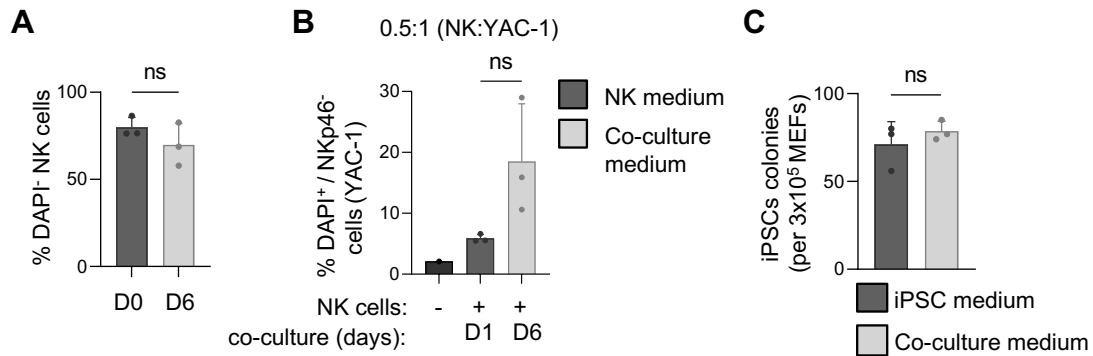

**Fig. S4. Co-culture medium maintains NK cell survival and cytotoxicity, and iPSC colony formation.** **A.** Viability of freshly isolated splenic WT NK cells and WT NK cells cultured in co-culture media for 6 days was analyzed. Gated from DAPI<sup>-</sup> cells ( $n=3$ ). **B.** Splenic WT NK cells were either primed overnight in NK cell medium (D1) or maintained in co-culture medium for 5 more days (D6). Both conditions were co-cultured with YAC-1 cells for 4 hours to assess their cytotoxic capacity. Cell death was assessed using DAPI and NK cells were excluded using NKp46 antibody ( $n=3$ ). **C.** *i4F* MEFs were reprogrammed *in vitro* with either iPSC medium for 11 days or with iPSC medium replaced by co-culture medium from days 2 to 6 of reprogramming. At day 11, iPSCs colonies were scored by Alkaline Phosphatase staining ( $n=3$ ).

## Figure S5

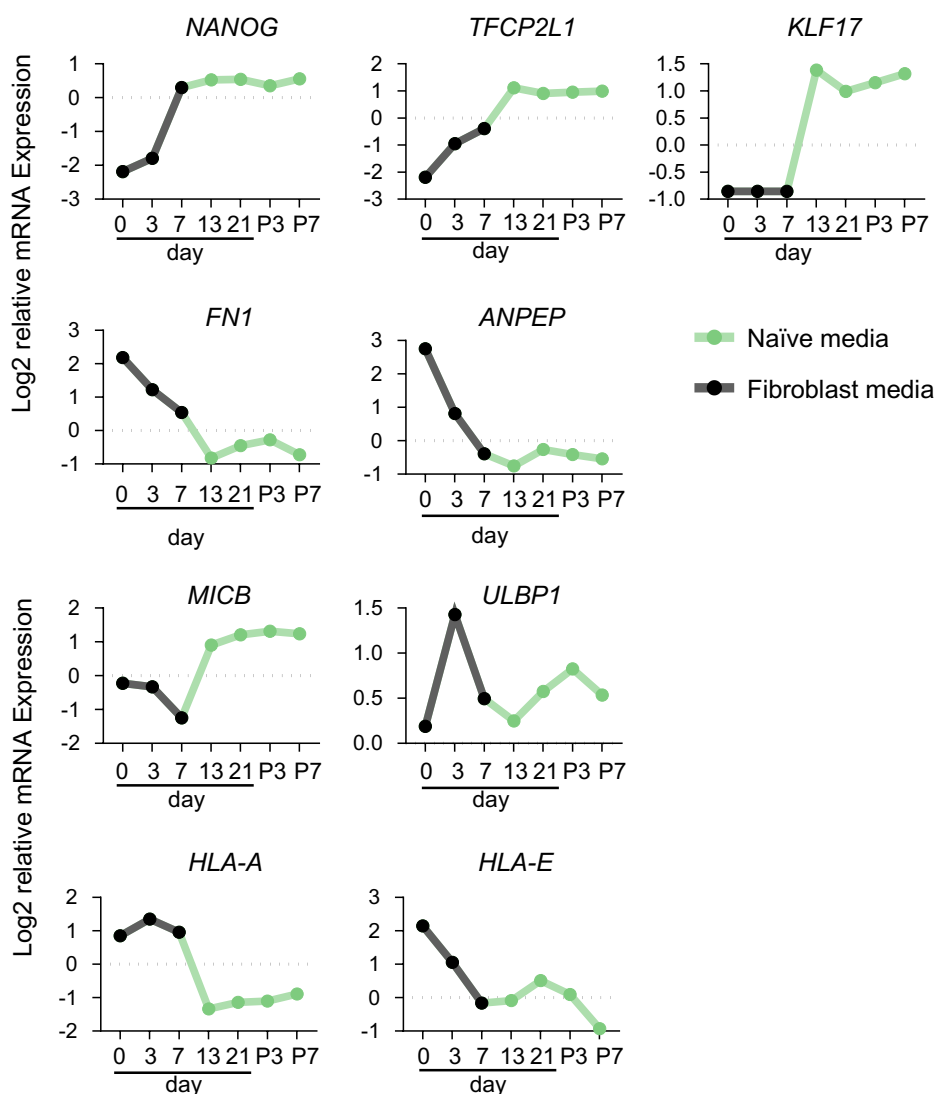

**Fig. S5. Human fibroblasts upregulate NK-activating ligand MICB and downregulate MHC-I molecules during reprogramming.** Previously published scRNAseq data from human dermal fibroblasts reprogrammed to naïve iPSCs for 21 days (Liu *et al.*, 2020). Cells were transduced with the transcription factors *OCT4*, *KLF4*, *SOX2* and *MYC*, and cultured in fibroblast medium for 7 days. Medium was changed to naïve medium at day 8 and cells were cultured until day 21. Relative mRNA expression of marker genes associated with pluripotency (*NANOG*, *TFCEP2L1* and *KLF17*), human fibroblasts (*FN1* and *ANPEP*), NK-activating ligands (*MICB* and *ULBP1*) and MHC-I molecules (*HLA-A* and *HLA-E*) are represented at days 0, 3, 7, 13 and 21, and passages (P) 3 and 7.

## Figure S6

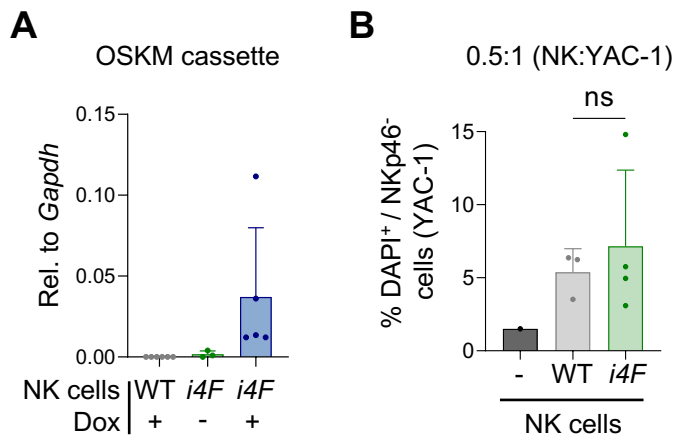

**Fig. S6. NK cells maintain their cytotoxic activity upon OSKM induction. A.** Spleens were harvested and NK cells were isolated on day 7 post-doxycycline (dox) initiation. Expression of the OSKM transgene was assessed by RT-qPCR ( $n=5$  for WT+ dox and *i4F* + dox groups, and  $n=3$  for *i4F* group). **B.** Percentage of DAPI<sup>+</sup> YAC-1 cells lysed by WT or *i4F* NK cells. Mice were reprogrammed *in vivo* for 5 days and NK cells were isolated from the spleen. NK cells were primed *in vitro* with IL-2 and IL-15 in NK media for 6 days in the presence of doxycycline (1  $\mu\text{g}/\text{ml}$ ). A cytotoxic assay using YAC-1 as target cells was done after 4 hours of co-culture. Cell death was assessed using DAPI and NK cells were excluded using NKp46 antibody ( $n=3$  for WT and  $n=4$  for *i4F* group).

## Figure S7

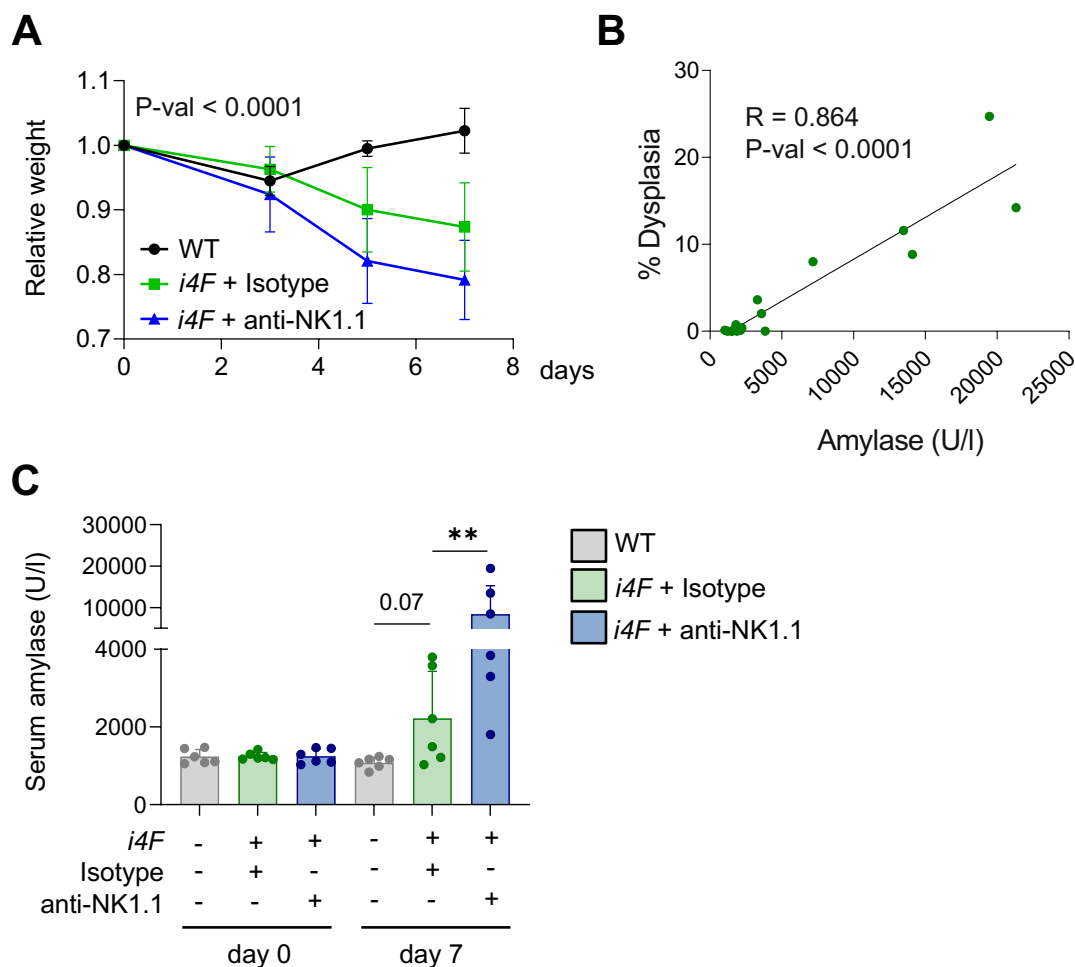

**Fig. S7. Reprogrammed *i4F* mice treated with anti-NK1.1 lose more weight and have higher levels of amylase in serum than *i4F* mice treated with isotype control antibody.** **A.** Relative weight loss of mice treated with doxycycline and anti-NK1.1 or isotype control antibodies for 7 days ( $n = 6$ ). **B.** Correlation between amylase in serum and percentage of dysplasia in pancreas of *i4F* mice at day 7 of reprogramming ( $n=12$ ). **C.** Amylase levels in serum at days 0 and 7 from reprogrammed mice treated with anti-NK1.1 or isotype control antibodies ( $n = 6$ ). Graphs represent mean  $\pm$  SD; \*\* $p < 0.01$  and statistical significance was evaluated using simple linear regression (**A** and **B**) and two-tailed Student's t-test (**C**).

**Table S1.** List of primers used for mRNA expression analyses.

| <b>Name</b>     | <b>Forward</b>           | <b>Reverse</b>           |
|-----------------|--------------------------|--------------------------|
| <i>E2A-cMyc</i> | GGCTGGAGATGTTGAGAGCAA    | AAAGGAAATCCAGTGGCGC      |
| <i>Rae1</i>     | ACCCGAATGCAGACAGGAAGTTGA | GGACCTTGAGGTTGATCTTGGCTT |
| <i>Mult1</i>    | CAATGTCTCTGTCCT CGGAA    | CTGAACACGTCTCAGGCACT     |
| <i>Icam1</i>    | CTGTTTGAGCTGAGCGAGAT     | AGGGTGAGGTCCTTGCCTAC     |
| <i>Cd155</i>    | CAACTGGTATGTTGGCCTCA     | ATTGGTGACTTCGCACACAA     |
| <i>Gapdh</i>    | AGGTCGGTGTGAACGGATTTG    | TGTAGACCATGTAGTTGAGGTCA  |



**Table S2.** List of fluorescent antibodies used for cytometry analyses.

| Antibody            | Source         | Identifier  | Dilution |
|---------------------|----------------|-------------|----------|
| B220 PE             | Biolegend      | 103207      | 1:200    |
| CD107a BV711        | Biolegend      | 564348      | 1:100    |
| CD11b A488          | BioLegend      | 101219      | 1:200    |
| CD11b BV786         | BD Biosciences | 740861      | 1:200    |
| CD11b PECy7         | eBioscience    | 25-0112-82  | 1:300    |
| CD11b PerCPCy5.5    | eBioscience    | 45-0112-82  | 1:400    |
| CD11c PE-Vio 770    | Milteny Biotec | 130-110-840 | 1:200    |
| CD155 PE-Cy7        | Biolegend      | 131512      | 1:200    |
| CD19-B220 APC-eF780 | eBioscience    | 47-0452-80  | 1:200    |
| CD3 AF700           | eBioscience    | 56-0032-82  | 1:100    |
| CD3 APC             | eBiosciences   | 17-0032-80  | 1:300    |
| CD3 FITC            | Biolegend      | 100203      | 1:100    |
| CD3ε PerCPCy5.5     | Biolegend      | 100327      | 1:100    |
| CD4 APC-eFluor780   | eBioscience    | 47-0041-80  | 1:200    |
| CD4 PE EF610        | eBioscience    | 61-0042-80  | 1:400    |
| CD45 BV605          | Biolegend      | 103139      | 1:400    |
| CD45 PE             | BD Biosciences | 553081      | 1:400    |
| CD45 PerCP          | BioLegend      | 103130      | 1:200    |
| CD54/ICAM1 FITC     | eBioscience    | 11-0541-82  | 1:200    |
| CD8 BV786           | BD Biosciences | 563332      | 1:400    |
| CD8 FITC            | eBioscience    | 11-0081-82  | 1:400    |
| F4/80 AF647         | BioLegend      | 123122      | 1:100    |
| F4/80 APC           | BioLegend      | 123115      | 1:100    |
| H60 APC             | Milteny Biotec | 130-108-821 | 1:100    |
| Ly49CI BV421        | BD Biosciences | 744027      | 1:100    |
| Ly6C FITC           | BD Biosciences | 561085      | 1:300    |
| Ly6G PE             | BD Biosciences | 561104      | 1:300    |
| NK1.1 APCCy7        | BioLegend      | 108723      | 1:400    |
| NK1.1 BV711         | Biolegend      | 108745      | 1:200    |
| NKG2A/CD159A PECy7  | Biolegend      | 142809      | 1:100    |
| NKG2D/CD314 PE      | Biolegend      | 130207      | 1:100    |
| NKp46-APC/Fire™ 750 | BD Biosciences | 137631      | 1:50     |
| Rae1 Pan FITC       | Milteny Biotec | 130-111-468 | 1:50     |
| ULBP1/MULT1 PE      | R&D Systems    | FAB2588P    | 1:100    |
